# Supplementary material
Source: PubMed Central journal article supplement (PMC3884526)
Supplement: neo1512_1354SD2.pdf [file neo1512_1354SD2.pdf]

Supplementary Table 1

Results of the RNA kinome screen. Viability of BxPC3 cells transfected with 4 pooled silencing sequences for 779 different kinases was analyzed in the presence of erlotinib in three independent runs. Changes in viability after transfection of the siRNA's are shown as mean +/-SD and median Z value of all three runs, normalized to the mean viability of all 779 kinases. Data are sorted according to the lowest mean Z value (genes whose knock-down reduced cell viability are shown at the top of the table, genes whose knock-down enhanced cell viability are shown at the bottom of the table).

| Gene     | Median      | Mean        | SD          |
|----------|-------------|-------------|-------------|
| MAP3K3   | -1,79241031 | -1,58769359 | 0,38162812  |
| PIP5K2A  | -1,49016789 | -1,56711218 | 0,304410091 |
| RPS6KA2  | -1,72838451 | -1,56403297 | 0,371425621 |
| MAP3K2   | -1,47048561 | -1,46707456 | 0,192574589 |
| JAK2     | -1,46451711 | -1,44065795 | 0,503356016 |
| DUSP2    | -1,62223726 | -1,4150333  | 0,545488936 |
| CHEK1    | -1,41019918 | -1,41019918 | 1,23684315  |
| INSRR    | -1,53421083 | -1,40357792 | 0,617723366 |
| SNF1LK   | -1,74468048 | -1,39902823 | 0,858717575 |
| PRKCN    | -1,53444903 | -1,39687072 | 0,231668467 |
| PFKFB3   | -1,30411134 | -1,39151794 | 0,250508983 |
| PXK      | -1,3608587  | -1,39093742 | 0,092702723 |
| DLG3     | -1,38431433 | -1,36270171 | 0,334159011 |
| PIK3R1   | -1,25337013 | -1,31541812 | 0,425088387 |
| AKT2     | -1,315388   | -1,315388   | 0,7571233   |
| WEE1     | -1,49978892 | -1,28686107 | 0,457935251 |
| PKN3     | -1,36134045 | -1,27309546 | 0,427707036 |
| AKT3     | -1,27000711 | -1,27000711 | 0,704010689 |
| CDC42BPA | -1,27948104 | -1,26244274 | 0,306295111 |
| MAPKAPK2 | -1,28871888 | -1,24592956 | 0,99223108  |
| RASGRF2  | -1,16327768 | -1,22880654 | 0,312402871 |
| C6ORF199 | -1,15505142 | -1,22031145 | 0,123336025 |
| EPHA8    | -1,54650398 | -1,2039582  | 0,676215537 |
| PIK3CB   | -1,37193689 | -1,19955785 | 0,694193771 |
| FLJ10761 | -1,18881004 | -1,18881004 | 1,325074607 |
| MAPKAPK3 | -1,14038965 | -1,18621003 | 0,808185996 |
| PRPSAP2  | -1,09558925 | -1,16580829 | 0,203303656 |
| KIF13B   | -1,32795206 | -1,15717077 | 0,594523016 |
| FGFR2    | -1,14260979 | -1,14260979 | 0,747741224 |
| DAPK1    | -1,24189563 | -1,13513095 | 0,513194428 |
| LMTK2    | -1,31263245 | -1,13167483 | 0,504658033 |
| CARD10   | -1,13985653 | -1,13161209 | 0,065907574 |
| ROCK2    | -1,30129891 | -1,13043764 | 0,358902669 |
| DAPK2    | -1,48839434 | -1,0958961  | 0,840690877 |
| NEK4     | -1,00048424 | -1,09231618 | 0,193703087 |
| HIPK1    | -1,08971725 | -1,08971725 | 0,060460304 |
| CDK6     | -0,86295645 | -1,07969531 | 0,409308748 |
| STK17A   | -1,08021631 | -1,07890938 | 0,177751527 |
| PCTK2    | -0,72037745 | -1,07462023 | 1,461514612 |
| MAP2K4   | -1,24647107 | -1,06210594 | 0,392851837 |
| STK17B   | -1,04124609 | -1,06093446 | 0,301681719 |
| GSG2     | -1,05194249 | -1,05194249 | 0,28433768  |
| PLK3     | -1,50153531 | -1,04828503 | 1,094234674 |
| CINP     | -1,04297862 | -1,04297862 | 0,325583809 |
| TAF1L    | -1,2392515  | -1,0385491  | 0,472110745 |
| DLG4     | -0,86657754 | -1,03691551 | 0,384720016 |
| KIAA1361 | -1,09634352 | -1,03396812 | 0,146248546 |

|         |             |             |             |
|---------|-------------|-------------|-------------|
| CAMKK2  | -0,99870234 | -1,02376824 | 0,114126858 |
| ERN1    | -1,0086146  | -1,0086146  | 0,284004571 |
| ADCK4   | -0,99300793 | -0,99300793 | 0,769691286 |
| PDGFRA  | -1,17723591 | -0,9891104  | 0,433488165 |
| TJP2    | -0,98039204 | -0,98486411 | 0,014672072 |
| BRDT    | -1,14825975 | -0,98151949 | 1,013164155 |
| FLT4    | -0,98024931 | -0,98024931 | 0,681980561 |
| EPHA4   | -1,4662011  | -0,97799231 | 0,871233625 |
| CARKL   | -1,08718864 | -0,97112725 | 0,214760548 |
| NPR1    | -0,50914582 | -0,96050496 | 1,089876282 |
| CDK5    | -0,85747586 | -0,95984705 | 0,227561876 |
| SQSTM1  | -0,94848443 | -0,95745007 | 0,321855199 |
| TLR4    | -0,94721851 | -0,94550155 | 0,292095186 |
| CDC2    | -1,1142515  | -0,94240867 | 0,392669189 |
| MAP3K14 | -1,08772445 | -0,93419143 | 0,365679091 |
| PHKG1   | -0,67581623 | -0,93181555 | 0,512505205 |
| MAP3K7  | -1,04886422 | -0,92986872 | 0,801924419 |
| SGK     | -0,67434857 | -0,92941954 | 0,530590767 |
| CRKL    | -1,08232343 | -0,92556838 | 0,310559727 |
| HAK     | -0,9250418  | -0,9250418  | 0,460810234 |
| BMP2K   | -1,18275349 | -0,92239432 | 0,548720761 |
| CDC7    | -0,7501354  | -0,92199694 | 0,357403406 |
| BUB1    | -0,70527345 | -0,91710929 | 0,489061471 |
| DGUOK   | -0,86225324 | -0,90768214 | 0,231759339 |
| ROR1    | -0,7789874  | -0,89711925 | 0,308140129 |
| PDIK1L  | -0,62866992 | -0,89480061 | 0,555335138 |
| MPP3    | -1,23772475 | -0,89413104 | 0,604187215 |
| DGKG    | -0,86061901 | -0,89024885 | 0,06356035  |
| MPZL1   | -0,93016295 | -0,88399057 | 0,420422836 |
| MAP3K4  | -0,97151427 | -0,86720885 | 0,251195184 |
| MASTL   | -0,86602126 | -0,86602126 | 0,552616398 |
| PRKY    | -0,91629177 | -0,86393202 | 0,142607678 |
| PRKACG  | -1,44739322 | -0,85927559 | 1,449483205 |
| PRKG1   | -0,7993344  | -0,852148   | 0,171815307 |
| MAP2K7  | -0,81336244 | -0,84788561 | 0,138372338 |
| BLK     | -1,20881151 | -0,84744267 | 1,253234571 |
| GALK2   | -0,84591555 | -0,84591555 | 1,181733852 |
| TP53RK  | -1,0827597  | -0,83816159 | 0,702998851 |
| DGKB    | -1,04705313 | -0,8381494  | 0,486340537 |
| CDC2L2  | -1,12497936 | -0,83478975 | 0,949413708 |
| PDLIM5  | -0,94202269 | -0,82060375 | 0,632314432 |
| AURKA   | -0,62450274 | -0,80973746 | 0,810617936 |
| TESK2   | -1,1434985  | -0,8054899  | 0,982449057 |
| HIPK2   | -0,80148163 | -0,80148163 | 0,0508282   |
| SRC     | -0,82298105 | -0,79706744 | 0,178261885 |
| ACVR2B  | -0,79431918 | -0,79431918 | 0,106706384 |
| CAMK2A  | -0,79942224 | -0,7938289  | 0,485827067 |
| PTPRJ   | -0,89709554 | -0,78772949 | 0,637777281 |
| VRK2    | -0,79386776 | -0,78400553 | 1,51121166  |
| NME4    | -0,69320062 | -0,78109404 | 0,508319597 |
| CXCL10  | -0,85669521 | -0,77660217 | 0,473492146 |
| DYRK2   | -0,70666232 | -0,77603944 | 0,341937625 |
| FGFR1   | -0,77389078 | -0,77389078 | 0,431942305 |
| EPHA7   | -1,31711846 | -0,76735315 | 1,075589629 |
| LIMK2   | -0,89099288 | -0,76721648 | 0,471264548 |
| ANGPT4  | -0,75654713 | -0,75654713 | 0,631731428 |
| COASY   | -1,01322135 | -0,75644416 | 0,624067763 |
| RPS6KA5 | -0,71552167 | -0,75154907 | 0,32682839  |

|          |             |             |             |
|----------|-------------|-------------|-------------|
| MARK4    | -1,19095099 | -0,75064412 | 1,348062237 |
| FN3K     | -0,74183098 | -0,74183098 | 0,135741134 |
| STK36    | -0,68480765 | -0,74049435 | 0,323700399 |
| RPS6KB1  | -0,91735779 | -0,74040939 | 0,430330253 |
| DCK      | -0,74151681 | -0,73876448 | 0,47246681  |
| MGC16169 | -0,65481179 | -0,7377686  | 0,189715475 |
| STK11    | -0,55746101 | -0,73020033 | 0,346691188 |
| RIPK3    | -1,21203422 | -0,7273076  | 1,092518891 |
| PRKCABP  | -0,6707756  | -0,72416039 | 0,913107767 |
| AKAP1    | -0,72381742 | -0,72381742 | 1,554206187 |
| STK39    | -0,20759144 | -0,72289348 | 1,150397903 |
| MAP4K2   | -0,8100419  | -0,72271263 | 0,164134096 |
| CDKL2    | -0,68593041 | -0,72082938 | 0,574588176 |
| GRK4     | -0,71842133 | -0,71842133 | 1,273979565 |
| LTK      | -0,7391681  | -0,71701467 | 0,711287349 |
| NEK1     | -0,99035723 | -0,71592312 | 0,552174205 |
| TEX14    | -0,25870579 | -0,71443815 | 0,969871566 |
| DAPK3    | -0,69841902 | -0,71374033 | 0,251861345 |
| PIK4CB   | -0,85608914 | -0,7119926  | 0,341147469 |
| CDK11    | -0,65063446 | -0,70839006 | 0,137693129 |
| PRKCSH   | -1,27912008 | -0,70731605 | 0,993552726 |
| ADRA1B   | -0,70464867 | -0,70464867 | 1,391705296 |
| CRK7     | -1,10432466 | -0,70283886 | 0,794769631 |
| CSNK1G3  | -0,61245702 | -0,69815763 | 0,345453132 |
| TXNDC3   | -0,85573808 | -0,69493115 | 0,640628715 |
| PIK3R3   | -0,68431343 | -0,67810855 | 0,070942801 |
| MVD      | -0,83858748 | -0,67337794 | 0,320554085 |
| MAP3K8   | -1,18229861 | -0,66725591 | 1,692173525 |
| CHRM1    | -0,66413276 | -0,66413276 | 1,596073258 |
| IRAK2    | -0,45627814 | -0,66221194 | 0,654792913 |
| ERK8     | -0,63529765 | -0,63529765 | 0,727526887 |
| LRRK1    | -0,63188311 | -0,63188311 | 0,54565661  |
| CDC2L1   | -0,70767316 | -0,62677708 | 0,427759461 |
| MYLK2    | -0,72781548 | -0,62163369 | 0,288422593 |
| PYCS     | -0,60748195 | -0,61960152 | 0,253799693 |
| TNIK     | -0,7494762  | -0,61226512 | 0,363941187 |
| CSNK1G2  | -0,59552696 | -0,60998744 | 0,096964654 |
| BMPR1B   | -0,6852415  | -0,60726614 | 0,315498134 |
| P15RS    | -0,50537979 | -0,60486635 | 0,246503124 |
| ACVR2    | -0,6041215  | -0,6041215  | 0,06493729  |
| TYK2     | -0,33628497 | -0,60357973 | 0,488223999 |
| STK19    | -0,54187513 | -0,59958324 | 0,713554003 |
| AK7      | -0,59911648 | -0,59911648 | 1,175618063 |
| EEF2K    | -0,35123657 | -0,59910188 | 0,491054505 |
| SEPHS2   | -0,60780644 | -0,5956823  | 0,532171628 |
| THNSL1   | -0,59406869 | -0,59406869 | 1,495710761 |
| GSK3B    | -0,59308516 | -0,59308516 | 0,400506969 |
| EPHA6    | -0,57778695 | -0,58717618 | 0,094899236 |
| MAST2    | -0,67642718 | -0,58617051 | 0,542231972 |
| ROS1     | -0,94751765 | -0,58360097 | 1,346982161 |
| STK3     | -0,46054606 | -0,58306043 | 0,347213904 |
| PTK9     | -0,71017451 | -0,58096984 | 0,553767643 |
| CLK1     | -0,57983062 | -0,57983062 | 0,598024904 |
| PRKAG1   | -0,40705205 | -0,57838481 | 0,976827299 |
| AAK1     | -0,57504527 | -0,57504527 | 1,173118498 |
| PKIB     | -1,0940038  | -0,5739591  | 1,275203158 |
| GALK1    | -0,56108812 | -0,56108812 | 0,929449507 |
| NEK9     | -0,83719659 | -0,56027843 | 0,669236565 |

|          |             |             |             |
|----------|-------------|-------------|-------------|
| MAP3K9   | -1,0638601  | -0,55685683 | 1,019004441 |
| ADRB2    | -0,55670529 | -0,55670529 | 1,407687274 |
| MAP2K5   | -0,36722625 | -0,55508196 | 0,492785797 |
| CHKB     | -0,55179413 | -0,55179413 | 1,42064499  |
| NAGK     | -0,74685068 | -0,55160336 | 0,372347003 |
| PRKCL1   | -0,63702103 | -0,55150688 | 0,481481158 |
| IRAK3    | -0,30441414 | -0,54810446 | 0,562556974 |
| KDR      | -0,07174883 | -0,54808246 | 2,106428376 |
| RAGE     | -0,40101069 | -0,54634192 | 1,0173195   |
| STK33    | -0,28729268 | -0,54396625 | 0,614089108 |
| MAPK11   | -0,63921847 | -0,54087697 | 0,345932323 |
| NEK6     | -0,63416428 | -0,54070999 | 0,215840372 |
| ADRA1A   | -0,53952581 | -0,53952581 | 1,889395852 |
| RYK      | -0,33252482 | -0,53869629 | 0,509071752 |
| BMX      | -0,66875986 | -0,52807362 | 0,92366635  |
| PRKAA2   | -0,21891588 | -0,52768166 | 0,738599918 |
| PHKA1    | -0,63943215 | -0,52748804 | 0,543170725 |
| MGC42105 | -0,49544598 | -0,5239301  | 0,541842754 |
| CDK10    | -0,55295346 | -0,52258972 | 0,057406473 |
| CLK3     | -0,52181784 | -0,52181784 | 0,328188826 |
| TXK      | -0,67496265 | -0,52017881 | 0,701725352 |
| CLK2     | -0,51921969 | -0,51921969 | 1,225987939 |
| PIK4CA   | -0,99268856 | -0,51739749 | 0,895271512 |
| CSNK2A1  | -0,5882418  | -0,51392949 | 0,294505768 |
| ACVRL1   | -0,51002132 | -0,51002132 | 0,828608468 |
| RAPGEF4  | -0,50977761 | -0,50977761 | 1,645478806 |
| STK38    | -0,32017359 | -0,5049839  | 0,592210891 |
| PLK2     | -0,38803006 | -0,50492146 | 0,276691597 |
| MERTK    | -0,37280591 | -0,50471593 | 0,373713013 |
| PLK4     | -0,67867534 | -0,50146268 | 0,521473179 |
| MAPK12   | -0,44857002 | -0,50108387 | 0,154963472 |
| MAPK8    | -0,98253432 | -0,50088173 | 1,489632979 |
| FER      | -0,50059583 | -0,50059583 | 2,032701356 |
| PRPS2    | -0,71197926 | -0,5000922  | 0,375955899 |
| UGP2     | -0,2712042  | -0,48973051 | 0,565106323 |
| CERK     | -0,48058474 | -0,48058474 | 0,753460996 |
| TNK2     | -0,47690492 | -0,47690492 | 1,257972807 |
| TTK      | -0,61276865 | -0,47603798 | 0,775543027 |
| RPS6KA4  | -0,5855106  | -0,47594045 | 0,327866478 |
| LAK      | -0,38969984 | -0,47582261 | 0,37186324  |
| CHKA     | -0,47497333 | -0,47497333 | 1,757346163 |
| FN3KRP   | -0,47157253 | -0,47157253 | 0,157219592 |
| C9ORF98  | -0,4684037  | -0,4684037  | 0,685648125 |
| COPB2    | -0,76365109 | -0,46802616 | 0,604222223 |
| RAF1     | 0,065710849 | -0,46536473 | 1,677347311 |
| FLJ23074 | -0,46279124 | -0,46279124 | 0,305814146 |
| STK10    | -0,51479842 | -0,45615522 | 0,831083038 |
| DUSP6    | -0,51173149 | -0,45550764 | 0,130916525 |
| UHMK1    | -0,20271488 | -0,451354   | 0,62338366  |
| FYB      | -0,44984762 | -0,44984762 | 0,937697136 |
| DNAJC3   | -0,39892779 | -0,43731603 | 0,23870458  |
| KIAA1804 | -0,56476133 | -0,43358617 | 0,477426826 |
| CCRK     | -0,87649905 | -0,42377426 | 1,032052463 |
| TTBK1    | -0,39462578 | -0,42291152 | 0,467985651 |
| NRBP     | -0,77045135 | -0,41715436 | 0,699480173 |
| STK38L   | -0,09320424 | -0,41638603 | 1,042502773 |
| GMFB     | -0,41286754 | -0,41286754 | 0,154069619 |
| FGFR3    | -0,41212128 | -0,41212128 | 1,007245115 |

|             |             |             |             |
|-------------|-------------|-------------|-------------|
| PFKM        | -1,01355423 | -0,41211993 | 1,287832798 |
| PLK1        | -1,01181587 | -0,41168209 | 1,367111088 |
| PFKFB2      | -0,30769786 | -0,40979084 | 0,40198849  |
| PKM2        | -0,45549776 | -0,40115456 | 0,410027252 |
| PRKG2       | -0,28540041 | -0,39879681 | 0,499061585 |
| PRKCA       | -0,64259145 | -0,39563548 | 0,432176938 |
| GK2         | -0,39519496 | -0,39519496 | 0,548592956 |
| CAMK2G      | -0,28016013 | -0,3950096  | 0,390517235 |
| TSKS        | -0,15817364 | -0,39285064 | 0,485146072 |
| ULK4        | -0,38991494 | -0,38991494 | 0,187472977 |
| PRKCZ       | -0,25723003 | -0,38407891 | 0,354988128 |
| MARK1       | -0,42753564 | -0,38227797 | 0,762780617 |
| PFKFB1      | -0,33608306 | -0,38174973 | 0,685455071 |
| PRPS1       | -0,43683042 | -0,37940486 | 0,281606297 |
| NME7        | -0,1717889  | -0,37830679 | 1,300575297 |
| STK22D      | -0,9305566  | -0,37439242 | 1,073952529 |
| CAMK1G      | -0,51600057 | -0,37355031 | 0,546126503 |
| PRKAR1A     | 0,035758136 | -0,37207679 | 0,752867761 |
| FYN         | -0,3716879  | -0,3716879  | 0,241194038 |
| GMFG        | -0,37114129 | -0,37114129 | 0,37313752  |
| PPP4C       | -0,37167248 | -0,3710826  | 0,626409622 |
| TLK1        | -0,23055979 | -0,36993273 | 0,401807835 |
| PGK2        | -0,34812218 | -0,36748038 | 0,084460786 |
| TYRO3       | -0,32426392 | -0,36129791 | 0,999975835 |
| CHEK2       | -0,36114215 | -0,36114215 | 1,146535836 |
| ABL2        | -0,36055827 | -0,36055827 | 0,648986365 |
| EVI1        | -0,35493965 | -0,35493965 | 0,380416369 |
| URKL1       | -0,48989497 | -0,34991227 | 0,537122039 |
| AKAP11      | -0,34978401 | -0,34978401 | 1,472252526 |
| PIK3CG      | -0,35046928 | -0,34826901 | 0,04800441  |
| PRKAG3      | 0,204147129 | -0,34812878 | 1,047124199 |
| PTK2        | 0,125197097 | -0,34496282 | 0,818932172 |
| SAST        | -0,32784989 | -0,33914582 | 0,194710317 |
| PRKCI       | -0,36147833 | -0,33790106 | 0,344145932 |
| NEK3        | -0,26443063 | -0,3351587  | 0,486585768 |
| EPHA2       | -0,69541131 | -0,33239932 | 1,483660242 |
| CIT         | -0,32568743 | -0,32568743 | 1,097783981 |
| LYN         | -0,46086796 | -0,3228124  | 0,778527772 |
| CKB         | -0,31995973 | -0,31995973 | 0,165457181 |
| ULK1        | -0,19008273 | -0,316811   | 0,23409627  |
| GSK3A       | -0,31623061 | -0,31623061 | 0,798013812 |
| AXL         | -0,77915718 | -0,3160668  | 1,11910304  |
| BLNK        | -0,37189586 | -0,31576255 | 0,4443599   |
| DLG1        | -0,20313922 | -0,314548   | 0,429716591 |
| PFKP        | -0,67998925 | -0,30920384 | 0,748585178 |
| PDK3        | -0,45399997 | -0,30354992 | 0,416472169 |
| MYO3B       | -1,23218161 | -0,30288482 | 2,183042868 |
| PRPF4B      | -0,5119966  | -0,30183488 | 0,505631638 |
| PAK2        | -0,34787755 | -0,30131102 | 0,425104014 |
| PANK3       | -0,50150371 | -0,30126577 | 1,019852519 |
| GRK5        | -0,29970382 | -0,29970382 | 0,508779114 |
| CDK3        | -0,0889     | -0,29122222 | 0,778184832 |
| PIK3C2A     | -0,26386242 | -0,29088487 | 0,449816557 |
| PHKA2       | -0,29372069 | -0,28899964 | 0,520086129 |
| KIT         | -0,23558657 | -0,28294411 | 0,490715577 |
| SRPK1       | 0,010365627 | -0,28147841 | 0,688809187 |
| RFK         | -0,28098942 | -0,28098942 | 1,263031854 |
| RP6-213H19. | 0,050940255 | -0,27957021 | 1,05998243  |

|            |             |             |             |
|------------|-------------|-------------|-------------|
| PIK3C2G    | -0,47791626 | -0,27911651 | 0,605239631 |
| PSKH2      | -0,25206289 | -0,27886586 | 0,240242802 |
| TPRXL      | -0,27825325 | -0,27825325 | 0,138619935 |
| GRK6       | -0,27577463 | -0,27577463 | 0,57186805  |
| CDK4       | -0,91437122 | -0,27532547 | 1,284955918 |
| TRIB3      | -0,41356313 | -0,2746597  | 0,26253547  |
| AATK       | -0,27438705 | -0,27438705 | 1,496961593 |
| MAPK6      | -0,06210594 | -0,27428803 | 0,69742907  |
| DKFZP761P0 | -0,022201   | -0,27389415 | 0,48242301  |
| GCK        | -0,27198794 | -0,27198794 | 0,409659179 |
| SMG1       | -0,28801541 | -0,27031228 | 0,065081887 |
| NME6       | 0,33402257  | -0,26537559 | 1,068321986 |
| TLK2       | -0,49088746 | -0,2648148  | 0,957613936 |
| IHPK2      | -0,13853134 | -0,26386338 | 0,249645644 |
| DLG2       | -0,25973484 | -0,26008886 | 0,472589739 |
| TLR3       | -0,38975718 | -0,26003825 | 0,74366787  |
| LATS1      | 0,279678619 | -0,25864006 | 2,449359475 |
| FUK        | -0,25632792 | -0,25632792 | 0,470112778 |
| PACSIN1    | -0,57264145 | -0,25270102 | 0,609253282 |
| INSR       | -0,26047618 | -0,25174151 | 0,320304395 |
| TPK1       | -0,43502821 | -0,2508462  | 0,65985725  |
| STK16      | -0,51574622 | -0,25027296 | 0,512354188 |
| NYD-SP25   | -0,12522071 | -0,24677198 | 0,79830639  |
| KIAA1639   | -0,33481656 | -0,24397937 | 0,410314038 |
| FLJ34389   | -0,24353157 | -0,24353157 | 0,505591719 |
| TAO1       | -0,08711641 | -0,24187231 | 0,426144663 |
| MARK2      | -0,24261138 | -0,24052911 | 0,891268185 |
| KIAA1811   | -0,30061148 | -0,23931931 | 0,205046592 |
| MAP3K12    | -0,22061089 | -0,23614894 | 0,340322277 |
| COL4A3BP   | -0,85897036 | -0,23513502 | 1,178922302 |
| GK         | -0,23486665 | -0,23486665 | 0,150431695 |
| CKMT1B     | -0,23174006 | -0,23174006 | 0,976138671 |
| CDKN3      | -0,77500365 | -0,22976659 | 1,62079454  |
| ADRBK1     | -0,22744992 | -0,22744992 | 1,902914471 |
| PRPSAP1    | -0,81901495 | -0,22553881 | 1,440418907 |
| AKAP13     | -0,22429032 | -0,22429032 | 0,286781586 |
| TTN        | -0,13184864 | -0,21882178 | 0,31245851  |
| MRC2       | -1,41145832 | -0,21811648 | 2,079841523 |
| CSK        | -0,5937939  | -0,21747674 | 0,655582638 |
| MKNK1      | 0,35553283  | -0,21317276 | 1,017068486 |
| MAPK14     | -0,28467314 | -0,21066731 | 0,324173012 |
| CAMKK1     | -0,24326021 | -0,21036657 | 0,073537712 |
| BTK        | -0,37837787 | -0,20441875 | 0,529006669 |
| PTK6       | -0,11170943 | -0,20184199 | 0,339507614 |
| UCK1       | -0,12289568 | -0,19851872 | 0,452240741 |
| PRKDC      | -0,54333902 | -0,18790151 | 0,713694606 |
| MUSK       | -0,94500871 | -0,18131414 | 1,558191782 |
| ADCK1      | -0,17900584 | -0,17900584 | 0,042534326 |
| PIK3R4     | 0,019082778 | -0,17892182 | 1,026467379 |
| PCTK1      | 0,264143908 | -0,1783874  | 0,850404103 |
| CDKL5      | -0,1243971  | -0,1754337  | 0,094833737 |
| BRD2       | -0,07679672 | -0,17091595 | 0,304965625 |
| MAP4K1     | -0,24602357 | -0,1650763  | 0,460683171 |
| CLK4       | -0,16367319 | -0,16367319 | 0,03676464  |
| PRKCM      | -0,23238234 | -0,16297869 | 0,247166074 |
| PDXK       | -0,24049239 | -0,15953262 | 0,385928045 |
| NTRK1      | -0,19725663 | -0,15547067 | 0,339153414 |
| NTRK3      | -0,32361488 | -0,15381352 | 0,303556614 |

|            |             |             |             |
|------------|-------------|-------------|-------------|
| DUSP4      | -0,24100781 | -0,15250717 | 0,346421472 |
| BDKRB2     | -1,13240662 | -0,15041585 | 2,123872972 |
| FLJ10074   | -0,14876544 | -0,14876544 | 0,273135531 |
| MGC5601    | -0,21727028 | -0,14498194 | 0,885585656 |
| LOC115704  | 0,077593035 | -0,13996865 | 0,688827344 |
| PTPRR      | 0,054638891 | -0,13909755 | 0,841263403 |
| CSNK1E     | -0,22549102 | -0,13698677 | 0,581642141 |
| MAK        | -0,06666387 | -0,13529572 | 1,368224203 |
| HCK        | -0,13413271 | -0,13413271 | 1,720065113 |
| ABL1       | -0,13107031 | -0,13107031 | 0,494565252 |
| STK31      | -0,09509273 | -0,12934018 | 0,150180826 |
| TIE        | -0,1619658  | -0,12719012 | 0,205558582 |
| CKS2       | -0,12672273 | -0,12672273 | 0,453636834 |
| CDKL1      | 0,249469958 | -0,12517139 | 0,784692992 |
| DYRK3      | 0,194668667 | -0,12250391 | 0,717817892 |
| PRKACB     | -0,68982973 | -0,11921606 | 1,199676066 |
| PMVK       | -0,18984653 | -0,11818727 | 2,142106528 |
| MELK       | -0,05884525 | -0,11709122 | 0,905456004 |
| LCP2       | 0,028584434 | -0,11468833 | 0,570841571 |
| PTPN5      | -0,14163642 | -0,11461346 | 0,118575097 |
| MAPK10     | -0,18806282 | -0,11324188 | 0,360183894 |
| KIAA1765   | -0,08696202 | -0,11183276 | 0,110843329 |
| GRK7       | -0,10724213 | -0,10724213 | 0,733956916 |
| SGK2       | -0,14804439 | -0,10384041 | 0,693265689 |
| CKM        | -0,10372392 | -0,10372392 | 1,707786306 |
| CDKN1B     | -0,08653999 | -0,10150011 | 0,323667084 |
| MAPK4      | -0,52182341 | -0,09915783 | 0,891873304 |
| MAPK13     | -0,27962299 | -0,09393288 | 1,242190774 |
| TRIO       | -0,44531502 | -0,09341749 | 0,680023068 |
| RAC1       | -0,01614757 | -0,08586049 | 0,758624787 |
| AKAP5      | -0,08400947 | -0,08400947 | 0,047304022 |
| NLK        | 0,073201611 | -0,08296478 | 0,411513824 |
| FRK        | -0,0812388  | -0,0812388  | 0,456067119 |
| SRPK2      | -0,09908275 | -0,0802095  | 0,233197022 |
| EPHA5      | -0,47794621 | -0,07989627 | 1,057916564 |
| ITPKA      | -0,18361802 | -0,07939997 | 0,395082094 |
| STK29      | 0,557778275 | -0,07741964 | 1,150444307 |
| CDKN2B     | 1,096917446 | -0,07520177 | 2,405834364 |
| LATS2      | -0,36872613 | -0,07370942 | 0,600780483 |
| NTRK2      | -0,19114455 | -0,07348448 | 0,930962729 |
| GUCY2D     | -0,06984739 | -0,06984739 | 0,384190363 |
| DCAMKL1    | 0,016302791 | -0,06964783 | 0,606140962 |
| LOC388445  | 0,01749202  | -0,06870799 | 0,666668462 |
| TNNI3K     | 0,174943575 | -0,06867705 | 1,028455326 |
| PPP1R1B    | 0,089473435 | -0,06612957 | 0,649815968 |
| RPS6KC1    | -0,04902734 | -0,06500281 | 0,523879487 |
| BUB1B      | -0,03869125 | -0,06403566 | 0,259443742 |
| DKFZP434C1 | -0,02600098 | -0,06049071 | 0,413283385 |
| PAK7       | -0,09347289 | -0,05887051 | 0,333388198 |
| AK3        | -0,05762002 | -0,05762002 | 0,183862269 |
| C14ORF20   | 0,190725946 | -0,05494578 | 0,471244846 |
| ADCK5      | -0,04989856 | -0,04989856 | 1,31983461  |
| TRPM6      | 0,285835647 | -0,047594   | 0,580846145 |
| TESK1      | -0,11134211 | -0,03042587 | 0,212667196 |
| ULK2       | 0,333360721 | -0,02682219 | 1,03248965  |
| PIK3R2     | 0,032195462 | -0,02659978 | 0,345855828 |
| CDK2       | -0,34993789 | -0,02379555 | 0,610698032 |
| PRKR       | 0,020817447 | -0,02310046 | 0,28642708  |

|          |             |             |             |
|----------|-------------|-------------|-------------|
| MYLK     | 0,004975233 | -0,02036048 | 0,093650044 |
| TOPK     | -0,01208529 | -0,01798022 | 0,232441609 |
| ROCK1    | 0,511966862 | -0,01717204 | 1,37473676  |
| EK11     | -0,10960677 | -0,01703987 | 0,503035649 |
| SYK      | -0,22422464 | -0,01503326 | 0,499239898 |
| PAK1     | -0,31552637 | -0,01360953 | 0,585733635 |
| MAP3K13  | 0,181356711 | -0,01124926 | 0,649620523 |
| ALK      | -0,00954351 | -0,00954351 | 0,248007114 |
| GNE      | -0,00192123 | -0,00192123 | 0,542868474 |
| TAF1     | -0,89491052 | -0,00133689 | 1,666003843 |
| PASK     | -0,05461088 | 0,003472164 | 0,154256129 |
| PRKCQ    | -0,28332586 | 0,003576463 | 1,254349191 |
| CALM3    | -0,06769745 | 0,005177503 | 0,417395191 |
| HIPK3    | 0,008439276 | 0,008439276 | 0,792706017 |
| DGKZ     | 0,068518818 | 0,011386705 | 0,388665427 |
| SPHK1    | -0,27192733 | 0,01767025  | 0,685802507 |
| DDR1     | -0,2974825  | 0,020250778 | 0,645418626 |
| SRMS     | 0,340629802 | 0,020446672 | 0,650346918 |
| MAP3K5   | -0,11005174 | 0,029983016 | 1,260980352 |
| JIK      | -0,05400796 | 0,030448842 | 0,735456398 |
| SPA17    | -0,51851341 | 0,032480904 | 1,510027164 |
| AGTR2    | 0,032998295 | 0,032998295 | 0,549161442 |
| DUSP10   | 0,365100205 | 0,037474012 | 0,612630125 |
| BCR      | -0,24833613 | 0,042364532 | 0,565003812 |
| CDK5RAP3 | 0,040890015 | 0,044643253 | 0,648236383 |
| IHPK3    | 0,170834529 | 0,047988703 | 0,243472961 |
| PCK1     | -0,03349654 | 0,056015612 | 0,357619878 |
| MAP2K3   | 0,142036281 | 0,061365707 | 0,231595937 |
| PDGFRB   | 1,013136859 | 0,06440816  | 2,398900291 |
| DUSP5    | 0,372319294 | 0,065550818 | 0,709282826 |
| ICK      | -0,06462988 | 0,068911721 | 0,736698404 |
| PFTK1    | -0,09841178 | 0,073837578 | 0,319737603 |
| ITPKB    | -0,03578055 | 0,076511117 | 0,936280533 |
| BMPR2    | 0,244164552 | 0,077862858 | 0,56386193  |
| ABI1     | 0,188895373 | 0,079988911 | 0,638234464 |
| PIP5KL1  | -0,14364747 | 0,081288973 | 0,592373761 |
| TTBK2    | 0,416233228 | 0,084019492 | 0,924526729 |
| CDADC1   | 0,189861081 | 0,085231712 | 0,396074066 |
| RPS6KA1  | 0,08904062  | 0,085789227 | 0,23456268  |
| SNRK     | 0,015937475 | 0,09258118  | 0,542712529 |
| PRKWINK1 | 0,135937468 | 0,092984749 | 0,24932247  |
| FLT1     | 0,101957134 | 0,101957134 | 0,050933806 |
| PITPNM3  | 0,479700624 | 0,102563848 | 0,833046238 |
| AKAP7    | 0,103428353 | 0,103428353 | 0,149625342 |
| ILK      | 1,075597354 | 0,104862307 | 1,825968481 |
| PTK9L    | -0,45208811 | 0,105895633 | 1,139353724 |
| RIPK2    | -0,12384428 | 0,105963027 | 0,59156746  |
| BMPR1A   | -0,04346374 | 0,121161785 | 0,654360598 |
| DTYMK    | 0,226920333 | 0,122978018 | 0,295415501 |
| PIK3C2B  | 0,559155225 | 0,126104326 | 0,815516491 |
| PACE-1   | 0,605244588 | 0,126249417 | 1,206758121 |
| NEK8     | -0,29394533 | 0,126298038 | 1,344826652 |
| PI4K2B   | 0,061157646 | 0,128855044 | 0,136672928 |
| HRI      | 0,133102641 | 0,133102641 | 0,573640188 |
| HIPK4    | 0,133311819 | 0,133311819 | 0,09813783  |
| AURKC    | 0,143368262 | 0,143368262 | 0,38649038  |
| CCL4     | 0,148367628 | 0,150545079 | 0,209155481 |
| NME3     | 0,269108345 | 0,151422697 | 0,411756833 |

|            |             |             |             |
|------------|-------------|-------------|-------------|
| MOS        | 0,621600795 | 0,158053747 | 0,812348647 |
| TK1        | 0,472963392 | 0,158333534 | 0,718372308 |
| STK24      | 0,121383909 | 0,158554041 | 0,220739412 |
| LYK5       | 0,080813495 | 0,159247562 | 0,288540804 |
| AK1        | 0,166967839 | 0,166967839 | 1,169544178 |
| PRKRA      | 0,188335414 | 0,173207512 | 0,304314507 |
| MARK3      | 0,083552286 | 0,173623948 | 0,310139905 |
| SMAD7      | 0,157012732 | 0,175838678 | 0,194100189 |
| CKS1B      | 0,177746604 | 0,177746604 | 0,541460839 |
| KIAA0999   | 0,170987384 | 0,179845197 | 0,953145738 |
| AK3L1      | 0,180405397 | 0,180405397 | 0,831654424 |
| PRKCB1     | 0,319954212 | 0,188563352 | 0,383946704 |
| C9ORF12    | 0,416607519 | 0,191016261 | 0,718109428 |
| TNK1       | 0,358479789 | 0,19421652  | 0,616975875 |
| RPS6KA3    | 0,540015753 | 0,195083343 | 0,947670334 |
| DUSP8      | 0,146888733 | 0,195299647 | 0,345388691 |
| CD3E       | 0,10252043  | 0,197553557 | 0,485928115 |
| PGK1       | 0,289760346 | 0,204408878 | 0,533636075 |
| WNK4       | -0,03090696 | 0,204669576 | 0,904258635 |
| IKBKAP     | 0,394278538 | 0,20565303  | 0,750705704 |
| MAST3      | 0,218330436 | 0,206761713 | 0,17820173  |
| PFKL       | 0,100271699 | 0,206951749 | 0,4260883   |
| CSNK1A1    | 0,145904311 | 0,208320365 | 0,493302625 |
| MAPK1      | 0,144626476 | 0,208902425 | 0,758381322 |
| MAP3K6     | 0,926320311 | 0,210243069 | 1,28310542  |
| DGKE       | 0,248279648 | 0,212268679 | 0,902612913 |
| PRKCL2     | -0,1502892  | 0,216319449 | 0,83090319  |
| KSR2       | 0,178296572 | 0,216577524 | 0,621810949 |
| DKFZP586B1 | 0,120439023 | 0,216694714 | 0,467197632 |
| PTPRT      | 0,572369812 | 0,217698112 | 0,672737344 |
| PNKP       | 0,520035185 | 0,219069201 | 0,609162619 |
| APEG1      | 0,219093166 | 0,219093166 | 0,046850676 |
| CDC42BPB   | 0,093668748 | 0,220244496 | 0,283897857 |
| IRAK1      | 0,427597005 | 0,223770999 | 0,699322761 |
| ACVR1C     | 0,226062849 | 0,226062849 | 0,367132922 |
| AKAP3      | 0,226846286 | 0,226846286 | 0,533174513 |
| PRPS1L1    | 0,232169639 | 0,231503597 | 0,072629368 |
| PANK1      | -0,18639217 | 0,231769939 | 1,200252248 |
| MPP2       | 0,160616517 | 0,231855616 | 0,86749386  |
| FRAP1      | 0,232760055 | 0,232760055 | 0,047127597 |
| CASK       | 0,119345854 | 0,232997337 | 0,296935307 |
| CHUK       | 0,23541659  | 0,23541659  | 2,901647473 |
| DDR2       | 0,268317965 | 0,23706377  | 0,766100248 |
| AVPR1A     | 0,238362432 | 0,238362432 | 0,20357017  |
| CDK7       | 0,124014198 | 0,242156048 | 0,353957415 |
| RNASEL     | 0,27659296  | 0,246342837 | 0,533280173 |
| DGKA       | 0,249610265 | 0,247033648 | 0,600220999 |
| AZU1       | 0,125778173 | 0,249124988 | 0,282522916 |
| FLJ13052   | 0,250783765 | 0,250783765 | 0,33393084  |
| MIDORI     | 0,04287259  | 0,25087644  | 0,480371637 |
| PANK4      | -0,06015226 | 0,254067424 | 0,564371172 |
| GUK1       | 0,255402781 | 0,255402781 | 0,159144234 |
| NME5       | 0,496798062 | 0,260594146 | 0,553923218 |
| MPP1       | 0,264039483 | 0,260781421 | 0,920034438 |
| FLJ12476   | 0,261741454 | 0,261741454 | 0,196706969 |
| RPS6KA6    | 0,653839572 | 0,263213234 | 0,970670356 |
| TGFBR1     | 0,021837238 | 0,264085647 | 0,614886464 |
| STK23      | 0,045801673 | 0,265353738 | 0,60489916  |

|           |             |             |             |
|-----------|-------------|-------------|-------------|
| AKAP4     | 0,265757632 | 0,265757632 | 1,167287197 |
| PTK7      | -0,18491339 | 0,267100158 | 1,119151738 |
| MYO3A     | 0,14781278  | 0,271164596 | 1,217693576 |
| TLR1      | 0,227792758 | 0,271235301 | 0,131296643 |
| ZAK       | 0,301763356 | 0,271886416 | 0,065047847 |
| TK2       | -0,03544699 | 0,27368825  | 0,545296015 |
| SCAP1     | -0,1297764  | 0,27444625  | 0,740292014 |
| IHPK1     | 0,280500372 | 0,276489108 | 0,071502737 |
| DUSP22    | 0,477128501 | 0,278941225 | 0,885460048 |
| CSNK2A2   | 0,197803964 | 0,287410315 | 0,942003672 |
| MAP3K10   | 0,233348955 | 0,288317673 | 0,548158622 |
| MAP2K1    | 0,333509675 | 0,295716392 | 0,642296915 |
| JAK1      | 0,17447741  | 0,298035016 | 0,392528314 |
| CSNK1G1   | 0,380463318 | 0,301643554 | 0,631404987 |
| FASTK     | 0,304999503 | 0,304999503 | 0,446898136 |
| IKKBK     | -0,05647238 | 0,307342599 | 0,66959086  |
| MET       | 0,361088494 | 0,310317401 | 0,094071679 |
| NRBP2     | 0,469373833 | 0,313017654 | 0,279438347 |
| MAPK9     | 0,474460411 | 0,313570176 | 0,676713939 |
| GUCY2C    | 0,314191183 | 0,314191183 | 0,138165586 |
| RPS6KB2   | 0,284206693 | 0,31591834  | 0,349503247 |
| PAK6      | 0,158559457 | 0,315973654 | 0,758666039 |
| SEPHS1    | 0,553915254 | 0,318177359 | 0,891675847 |
| NPR2      | 0,237335083 | 0,318968344 | 0,166165794 |
| MGC4796   | 0,317994515 | 0,32432977  | 0,615155778 |
| PPP2CA    | 0,548153102 | 0,326420794 | 0,58219917  |
| OSR1      | 0,542569163 | 0,329869599 | 1,217901749 |
| ARAF1     | 0,330073496 | 0,330073496 | 0,779145513 |
| VRK3      | 0,414017996 | 0,331438998 | 0,157710943 |
| TNFRSF10A | 0,329400195 | 0,336285883 | 1,235132    |
| PDPK1     | 0,284310717 | 0,336859538 | 0,550608256 |
| CD4       | 0,403863426 | 0,339077716 | 0,142960366 |
| PI4KII    | 0,062815407 | 0,340200361 | 0,84678131  |
| SNARK     | 0,307401551 | 0,34322128  | 0,463297157 |
| MAPKAPK5  | 0,384214361 | 0,343571528 | 0,155838552 |
| DOK1      | 0,405427084 | 0,348163552 | 0,227221164 |
| CKMT2     | 0,350227157 | 0,350227157 | 2,121420584 |
| GAP43     | 0,350420439 | 0,350420439 | 0,39759657  |
| STK32B    | 0,351838168 | 0,351838168 | 0,808684698 |
| MAPK3     | 0,637190625 | 0,351841435 | 0,928160286 |
| CSF1R     | 0,290680247 | 0,35236982  | 1,341985272 |
| WIF1      | 0,283462581 | 0,352391155 | 0,274197378 |
| CSNK2B    | 0,096136345 | 0,363704843 | 0,716268041 |
| MAP4K3    | 1,077824129 | 0,365442921 | 1,325880192 |
| MGC45428  | 0,780380772 | 0,370201643 | 0,794877295 |
| TEC       | 0,170909452 | 0,372926526 | 0,489700616 |
| ERBB4     | 0,378791337 | 0,378791337 | 1,204254492 |
| CARD14    | -0,1800152  | 0,378924732 | 1,084327114 |
| CAMK1     | 0,83064326  | 0,384183135 | 1,215532003 |
| STYK1     | 0,731381078 | 0,388861882 | 1,384064115 |
| STK22B    | 0,273274777 | 0,38892172  | 0,39429318  |
| MGC8407   | -0,06479584 | 0,392550394 | 1,167325881 |
| KHK       | 0,362122026 | 0,399146804 | 0,358972885 |
| TGFBR2    | 0,774293561 | 0,402286308 | 1,061509378 |
| HUNK      | 0,408160361 | 0,408160361 | 1,956431827 |
| HK3       | 0,40823639  | 0,40823639  | 0,291607709 |
| CAMK2D    | 0,844019212 | 0,408405555 | 0,767948925 |
| NEK7      | 0,679828711 | 0,408807913 | 1,151369766 |

|           |             |             |             |
|-----------|-------------|-------------|-------------|
| PDK4      | 0,161296997 | 0,412024526 | 0,512717224 |
| SSTK      | 0,279153287 | 0,419467756 | 0,481714236 |
| CDK5R1    | 0,443047083 | 0,419897175 | 0,153148623 |
| PRKX      | -0,03695011 | 0,419907767 | 1,194194301 |
| SCYL1     | 0,269284763 | 0,425265359 | 0,931751148 |
| PTK2B     | 0,537161515 | 0,428524767 | 1,299218133 |
| AKAP6     | 0,431472088 | 0,431472088 | 0,237279672 |
| PPP2CB    | 0,824383635 | 0,436558004 | 0,920463912 |
| AKT1      | 0,439184245 | 0,439184245 | 0,467492508 |
| ADK       | 0,441343767 | 0,441343767 | 1,56835939  |
| LIMK1     | 0,374986673 | 0,442087483 | 0,329936138 |
| FLT3      | 0,443496269 | 0,443496269 | 1,310564674 |
| CD7       | 0,74378991  | 0,452206634 | 0,634173691 |
| FGR       | 0,452622166 | 0,452622166 | 0,781461631 |
| PCTK3     | -0,01711361 | 0,458342462 | 1,080589768 |
| GUCY2F    | 0,462741046 | 0,462741046 | 0,222874424 |
| RET       | 0,77254281  | 0,469873139 | 0,598102849 |
| ANKRD3    | 0,471301775 | 0,471301775 | 0,232599332 |
| PRKD2     | 0,237919495 | 0,474024609 | 0,51535746  |
| PAG       | 0,3434574   | 0,474084581 | 0,434677032 |
| EDN2      | 0,208721667 | 0,475997124 | 0,484253098 |
| STK22C    | 0,630923346 | 0,48094241  | 0,869921768 |
| DGKD      | 0,071444771 | 0,482435533 | 1,25685266  |
| ITGB1BP1  | 0,483140262 | 0,483140262 | 0,835313534 |
| AKAP8     | 0,483891916 | 0,483891916 | 0,025983299 |
| AK2       | 0,484046834 | 0,484046834 | 0,334491565 |
| MAP2K1IP1 | 0,294933508 | 0,486456307 | 0,455842621 |
| C9ORF96   | 0,846551055 | 0,491634786 | 0,839229114 |
| PRKAR2B   | 0,094375429 | 0,494335452 | 1,03994158  |
| ALS2CR2   | 0,504129506 | 0,504129506 | 1,413917439 |
| GFRA2     | 0,513411128 | 0,513411128 | 0,056664477 |
| TRIB2     | 0,387169636 | 0,519022468 | 0,51944277  |
| ACVR1     | 0,522727736 | 0,522727736 | 0,522426952 |
| UMP-CMPK  | 0,561171734 | 0,530720719 | 0,457611112 |
| ATR       | 0,53762369  | 0,53762369  | 0,046103435 |
| CDK9      | 0,715457044 | 0,541279507 | 0,947818934 |
| IRS1      | 0,138412609 | 0,541728639 | 0,958630304 |
| XYLB      | 0,583354276 | 0,542233952 | 0,925316558 |
| NME2      | 0,573208744 | 0,545149195 | 0,146855197 |
| AK5       | 0,549706446 | 0,549706446 | 0,656375307 |
| ALS2CR7   | 0,551031263 | 0,551031263 | 0,976793003 |
| TAO1      | 0,399415162 | 0,551946484 | 0,512008644 |
| ADCK2     | 0,552949561 | 0,552949561 | 1,267285183 |
| PRKCH     | 0,710199498 | 0,555818846 | 0,431614424 |
| PRKCG     | 0,615854085 | 0,556829032 | 0,460222968 |
| MGC26597  | 0,589679913 | 0,558141632 | 0,216045434 |
| ILKAP     | 0,747947217 | 0,561623246 | 0,359349922 |
| CSNK1D    | -0,08172921 | 0,567991621 | 1,183549019 |
| PRKAA1    | 0,678152334 | 0,568278195 | 0,253296007 |
| VRK1      | 0,040674984 | 0,568613442 | 0,916730733 |
| SGKL      | 0,319340174 | 0,569256654 | 1,526021527 |
| STK4      | 0,119331227 | 0,569503885 | 1,496331395 |
| PAK3      | 0,564002144 | 0,570741045 | 0,54860405  |
| MATK      | 0,497742349 | 0,572498224 | 0,495068138 |
| YWHAH     | 0,497923867 | 0,572779849 | 0,15986476  |
| STK32C    | 0,535271181 | 0,574879329 | 0,973338232 |
| C7ORF16   | 0,474076353 | 0,579354775 | 0,221196267 |
| MBIP      | 0,53980245  | 0,583231122 | 0,290023602 |

|          |             |             |             |
|----------|-------------|-------------|-------------|
| NME1     | 0,745879038 | 0,583400205 | 0,288357044 |
| MINK     | 0,535504671 | 0,586001598 | 0,258641172 |
| MARCH4   | 0,694559949 | 0,590576861 | 1,445381096 |
| TRPM7    | -0,57841539 | 0,595420791 | 3,229438422 |
| CDKN2D   | 0,627677594 | 0,596639575 | 1,106231127 |
| RFP      | 0,775395346 | 0,600489751 | 0,78180109  |
| NEK2     | 0,552590445 | 0,603167201 | 1,207654494 |
| FGFR4    | 0,607095426 | 0,607095426 | 2,464546933 |
| DYRK4    | 0,74201843  | 0,618366227 | 0,784986994 |
| RIPK1    | 0,726167642 | 0,620040773 | 0,266467593 |
| DGKQ     | 0,74831719  | 0,62430292  | 1,140143479 |
| MAPK8IP1 | -0,12997028 | 0,628764382 | 1,600802624 |
| CAMK4    | 0,646234763 | 0,63300921  | 0,058267357 |
| CNKSR1   | -0,30989924 | 0,633010745 | 2,034519458 |
| ITK      | 0,600726727 | 0,636485033 | 0,833359815 |
| ASP      | 0,638868097 | 0,638868097 | 0,855321737 |
| RPS6KL1  | 0,261964429 | 0,639933636 | 0,851942206 |
| YES1     | 0,694605121 | 0,640169093 | 0,192729582 |
| SIK2     | 0,595236879 | 0,6450476   | 0,132431273 |
| MST1R    | 0,543447226 | 0,646918563 | 0,635403811 |
| PIM2     | -0,47214601 | 0,648098001 | 2,29641069  |
| MAP2K2   | 0,980455672 | 0,650040452 | 0,634791276 |
| PFKFB4   | 0,524372857 | 0,650920908 | 0,602826263 |
| STK35    | 1,159127319 | 0,661083581 | 1,211449673 |
| DUSP1    | 0,874226752 | 0,661858659 | 1,161987692 |
| EPHB4    | 0,689804803 | 0,662877395 | 0,623310205 |
| CAMK2B   | 0,705596285 | 0,668205582 | 0,162826007 |
| STK32A   | 0,316049235 | 0,672370151 | 0,737429191 |
| MVK      | 0,428165673 | 0,680307223 | 0,567680905 |
| SPHK2    | 0,663099873 | 0,680996594 | 0,154610127 |
| ROR2     | 0,89327672  | 0,682118741 | 0,433049678 |
| DYRK1B   | 1,312229795 | 0,684746416 | 1,122400651 |
| EIF2AK3  | 1,127020078 | 0,687486241 | 0,770617712 |
| AMHR2    | 0,691122879 | 0,691122879 | 1,052707746 |
| PAPSS2   | 0,732392319 | 0,697058979 | 0,141676077 |
| PAPSS1   | 0,630192429 | 0,703178916 | 0,387248311 |
| CDK8     | 0,764536636 | 0,707810821 | 0,427198697 |
| YWHAQ    | -0,09283813 | 0,709169494 | 1,9667204   |
| STK25    | 0,439558304 | 0,709814783 | 1,108577572 |
| HK1      | 0,715738033 | 0,715738033 | 0,297826503 |
| RAPGEF3  | 0,713988329 | 0,719131402 | 0,699474276 |
| JAK3     | 0,826010101 | 0,721699595 | 0,714146917 |
| MAP2K6   | -0,98239142 | 0,721896066 | 3,351382839 |
| EXOSC10  | 0,620579921 | 0,738855577 | 0,467322905 |
| MAP4K5   | 0,998319855 | 0,741673547 | 0,49590907  |
| MAGI-3   | 0,209134444 | 0,744036054 | 1,945391883 |
| IKBKE    | 1,215358153 | 0,744714411 | 0,845335815 |
| CDKN2C   | 0,512079524 | 0,751298957 | 0,47757231  |
| ERBB3    | 0,761665712 | 0,761665712 | 0,418111968 |
| NBEA     | 1,355549178 | 0,764907939 | 1,114582972 |
| TLR6     | 0,811451618 | 0,768638529 | 0,930614968 |
| LCK      | 0,828137969 | 0,772024414 | 0,184512735 |
| IGF1R    | 0,64150199  | 0,776380781 | 0,244414609 |
| PDK1     | 1,208392882 | 0,776998675 | 0,87023004  |
| FES      | 0,787590248 | 0,787590248 | 0,490013948 |
| MALT1    | 0,541195337 | 0,787617302 | 0,948146448 |
| AURKB    | 0,790801355 | 0,790801355 | 0,773565221 |
| AVPR1B   | 0,793362178 | 0,793362178 | 1,830902831 |

|          |             |             |             |
|----------|-------------|-------------|-------------|
| ADRBK2   | 0,796282361 | 0,796282361 | 1,148655492 |
| ADAM9    | 0,806624804 | 0,806624804 | 0,64084004  |
| CAMK1D   | 0,573127985 | 0,811843398 | 0,771174914 |
| SHC1     | 0,720773489 | 0,815180074 | 0,182949341 |
| BRAF     | 0,739306155 | 0,815837291 | 0,58510236  |
| PKMYT1   | 0,621017925 | 0,818513632 | 1,50685972  |
| MKNK2    | 0,844963614 | 0,826039814 | 0,940879833 |
| GAK      | 0,826072436 | 0,826072436 | 0,121662474 |
| RP2      | 1,042384617 | 0,83738079  | 0,700825044 |
| CCL2     | 0,963376201 | 0,839725874 | 0,37697383  |
| NRG3     | 0,524734101 | 0,841434708 | 0,76448159  |
| EPHB1    | 1,226697208 | 0,845511075 | 0,783213403 |
| ERBB2    | 0,845982736 | 0,845982736 | 0,106084819 |
| PDK2     | 0,51212437  | 0,852570787 | 0,996020957 |
| MLCK     | 0,868789118 | 0,852766424 | 0,287546479 |
| PTPRG    | 1,743868123 | 0,858629205 | 1,907902534 |
| EPHA1    | 1,225330319 | 0,873957461 | 1,015207801 |
| UMPK     | 0,782009777 | 0,881504781 | 0,256953377 |
| EPHB6    | 1,103279943 | 0,88489266  | 0,657782662 |
| KALRN    | 0,942102088 | 0,900723636 | 0,793059367 |
| SOCS1    | 1,042468836 | 0,900897366 | 1,533057396 |
| DYRK1A   | 0,983345573 | 0,903042908 | 0,270377633 |
| ARK5     | 0,906345639 | 0,906345639 | 0,322595274 |
| ITPKC    | 1,024597028 | 0,907032371 | 0,655512972 |
| PSKH1    | 0,793021871 | 0,911258494 | 0,826388391 |
| TRIM     | 0,821229946 | 0,916447793 | 0,401548624 |
| PRKACA   | 0,912564102 | 0,919845675 | 0,833045969 |
| PIP5K1A  | 0,954213796 | 0,933184232 | 1,95509014  |
| PIK3CA   | 0,683798853 | 0,939489988 | 1,043823103 |
| GRK1     | 1,195619143 | 0,941649225 | 0,936577693 |
| PAK4     | 0,994381634 | 0,942420987 | 0,12880293  |
| ACVR1B   | 0,947847038 | 0,947847038 | 1,048833751 |
| GTF2H1   | 0,957238558 | 0,957238558 | 1,926913067 |
| PRKWNK3  | 0,799605108 | 0,962448336 | 0,520564939 |
| PCK2     | 0,587316805 | 0,967104252 | 0,67311157  |
| ATM      | 0,986166624 | 0,986166624 | 0,793777404 |
| RIOK1    | 0,498059761 | 0,986939536 | 0,888319034 |
| IPMK     | 1,453664725 | 0,992874103 | 1,129033098 |
| FLJ23356 | 0,995492933 | 0,995492933 | 1,309866841 |
| MAP4K4   | 0,727572825 | 0,997297467 | 2,054248119 |
| DGKI     | 0,864059808 | 1,000265028 | 0,307869501 |
| LMTK3    | 1,227006794 | 1,007061623 | 0,439164173 |
| PRKCD    | 0,771618941 | 1,010228314 | 0,51180813  |
| CSNK1A1L | 1,290327812 | 1,052838356 | 0,675952498 |
| FLJ25006 | 1,056481918 | 1,056481918 | 3,014346633 |
| EGFR     | 1,419808815 | 1,059990623 | 0,741951523 |
| HK2      | 1,095299309 | 1,095299309 | 0,018930941 |
| FRDA     | 1,127445736 | 1,127445736 | 0,293850937 |
| MAPK8IP3 | 1,107796374 | 1,12863533  | 1,44437155  |
| MAP3K11  | 1,004022635 | 1,130732925 | 0,231925315 |
| PKIA     | 1,116400749 | 1,135979817 | 1,100100879 |
| NEK11    | 1,078738739 | 1,139353636 | 1,865689963 |
| TEK      | 0,689186893 | 1,142571898 | 1,010358563 |
| CDKN1A   | 1,879594502 | 1,147831377 | 1,490949253 |
| EPHB3    | 0,618887344 | 1,150960434 | 1,883543205 |
| SLK      | 1,779832433 | 1,152211963 | 1,316261088 |
| ITPK1    | 1,032137258 | 1,168316179 | 0,302410976 |
| CDKL3    | 1,108339124 | 1,169241758 | 1,691806898 |

|          |             |             |             |
|----------|-------------|-------------|-------------|
| ASK      | 1,18051077  | 1,18051077  | 1,316769751 |
| MULK     | 1,180713111 | 1,180713111 | 2,551524104 |
| PRKWINK2 | 0,919114407 | 1,195474958 | 0,689812683 |
| APPL     | 1,197038457 | 1,197038457 | 0,111037619 |
| CDK5RAP1 | 1,025207189 | 1,208399729 | 0,324819877 |
| MAPK8IP2 | 1,316744473 | 1,218206378 | 1,298935694 |
| SOCS5    | 1,192150232 | 1,229017227 | 0,635127341 |
| EPHA3    | 0,9117929   | 1,235631894 | 0,925744149 |
| TRIB1    | 0,827989538 | 1,249919188 | 0,802636375 |
| DMPK     | 1,782701337 | 1,2615454   | 1,583795126 |
| PRKCE    | 1,367469404 | 1,298206358 | 0,381300656 |
| CDC2L5   | 0,863354999 | 1,305609808 | 1,17533846  |
| PKLR     | 1,71512294  | 1,312716174 | 0,809658424 |
| SPEC2    | 1,336452743 | 1,330453128 | 0,758058727 |
| HSPB8    | 1,338355923 | 1,338355923 | 1,076758355 |
| EPHB2    | 0,985221715 | 1,355994898 | 0,845696495 |
| PRKAR2A  | 1,699019013 | 1,389897286 | 0,557663845 |
| ZAP70    | 1,302987362 | 1,424212798 | 0,53259738  |
| IL2      | 1,370681223 | 1,433963554 | 0,913774024 |
| MAP3K1   | 0,591146512 | 1,48027234  | 2,516613052 |
| PIM1     | 0,456737838 | 1,529271395 | 3,26844307  |
| TBK1     | 1,508503344 | 1,569471978 | 0,559019349 |
| PIP5K2B  | 1,665296797 | 1,592271593 | 1,157598551 |
| PINK1    | 0,722656016 | 1,609286291 | 2,101997703 |
| BCKDK    | 1,772771016 | 1,631715882 | 0,434360285 |
| RBKS     | 0,630072702 | 1,673903468 | 2,810197897 |
| FLJ32685 | 1,700249152 | 1,700249152 | 0,331519845 |
| PHKG2    | 1,3879729   | 1,781800267 | 1,636570526 |
| MAPK7    | 1,505968208 | 1,868374654 | 0,851088128 |
| CDKN1C   | 2,277825745 | 2,056469987 | 0,718881338 |
| PIP5K2C  | 1,58536292  | 2,06937604  | 1,170921941 |
| RIOK3    | 1,283018858 | 2,084396577 | 1,959983295 |
| ANKK1    | 2,153617657 | 2,153617657 | 2,672413342 |
| CDK5R2   | 2,961172465 | 2,725430291 | 1,2832581   |
| EIF2AK4  | 3,467248657 | 2,738012363 | 1,293332921 |
| HSMDPKIN | 2,966893113 | 2,966893113 | 2,745523185 |
